# Supplementary material for: Deployment and Evaluation of a Low-Cost Sensor System for Atmospheric CO 2 Monitoring on a Sea-Air Interface Buoy
Source: Copernicus journal article supplement (doi:10.5194/egusphere-2025-5588), 2026-01-19
Supplement: Supplementary file 1 [file egusphere-2025-5588-supplement.pdf]

## Supplementary information of

# Deployment and Evaluation of a Low-Cost Sensor System for Atmospheric CO<sub>2</sub> Monitoring on a Sea-Air Interface Buoy

Jialu Liu<sup>1,2</sup>, Pengfei Han<sup>3\*</sup>, Huiling Ouyang<sup>1,4</sup>, Ning Zeng<sup>5,6</sup>, Zhenfeng Wang<sup>1</sup>, Jian Wang<sup>1</sup>, Weiwei Fu<sup>1,2</sup>, Honggang Lv<sup>7</sup>, Wenhao Lin<sup>8</sup>, Zheng Xia<sup>1,9,10</sup>, Bo Yao<sup>1,2, 11\*</sup>

<sup>1</sup>Department of Atmospheric and Oceanic Sciences and Institute of Atmospheric Sciences, Fudan University, Shanghai, 200438, China

<sup>2</sup>Shanghai Frontiers Science Center of Atmosphere-Ocean Interaction, Key Laboratory of Polar Atmosphere-Ocean-Ice System for Weather and Climate of Ministry of Education, and Shanghai Key Laboratory of Ocean-Land-Atmosphere Boundary Dynamics, Fudan University, Shanghai, 200438, China

<sup>3</sup>State Key Laboratory of Atmospheric Environment and Extreme Meteorology, Institute of Atmospheric Physics, Chinese Academy of Sciences, Beijing, 100029, China

<sup>4</sup>Observation and Research Station of Huaniaoshan East China Sea Ocean-Atmosphere Integrated Ecosystem, Ministry of Natural Resources, Shanghai, 200136, China

<sup>5</sup>Department of Atmospheric and Oceanic Science, University of Maryland, College Park, Maryland, 20742, USA

<sup>6</sup>Earth System Science Interdisciplinary Center, University of Maryland, College Park, Maryland, 20742, USA

<sup>7</sup>Key Laboratory of Marine Hazards Forecasting, National Marine Environmental Forecasting Center, Ministry of Natural Resources (MNR), Beijing, 100081, China; National Marine Environmental Forecasting Center, Beijing, 100081, China

<sup>8</sup>Zhejiang Environmental Monitoring Engineering, Co.Ltd., 310013, China

<sup>9</sup>Zhejiang Ecological and Environmental Monitoring Center, Hangzhou, 310012, China

<sup>10</sup>Zhejiang Key Laboratory of Ecological and Environmental Monitoring, Forewarning and Quality Control, Hangzhou, 310012, China

<sup>11</sup>National Observation and Research Station for Wetland Ecosystems of the Yangtze Estuary, Shanghai, 201112, China

*Correspondence to:* Bo Yao ([yaobo@fudan.edu.cn](mailto:yaobo@fudan.edu.cn)); Pengfei Han ([pfhan@mail.iap.ac.cn](mailto:pfhan@mail.iap.ac.cn))

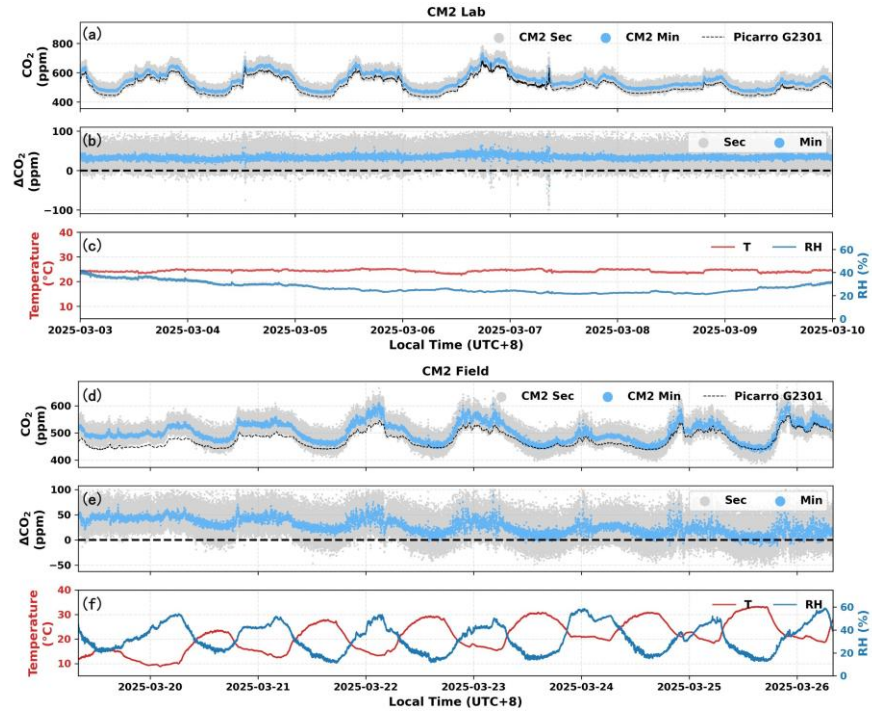

**Figure S1:** Time series of CM2 data during laboratory (a, c, e) and land-based field (b, d, f) observations. (a, d) CM2-measured CO<sub>2</sub> concentration at second-level resolution (grey dots) and minute-level resolution (blue dots), alongside Picarro-measured CO<sub>2</sub> concentration (black line). (b, e) Time series of CO<sub>2</sub> concentration difference ( $\Delta\text{CO}_2 = \text{CM2} - \text{Picarro}$ ) at second-level (grey dots) and minute-level (blue dots) resolution. (c, f) Time series of ambient temperature (T, red line) and relative humidity (RH, blue line).

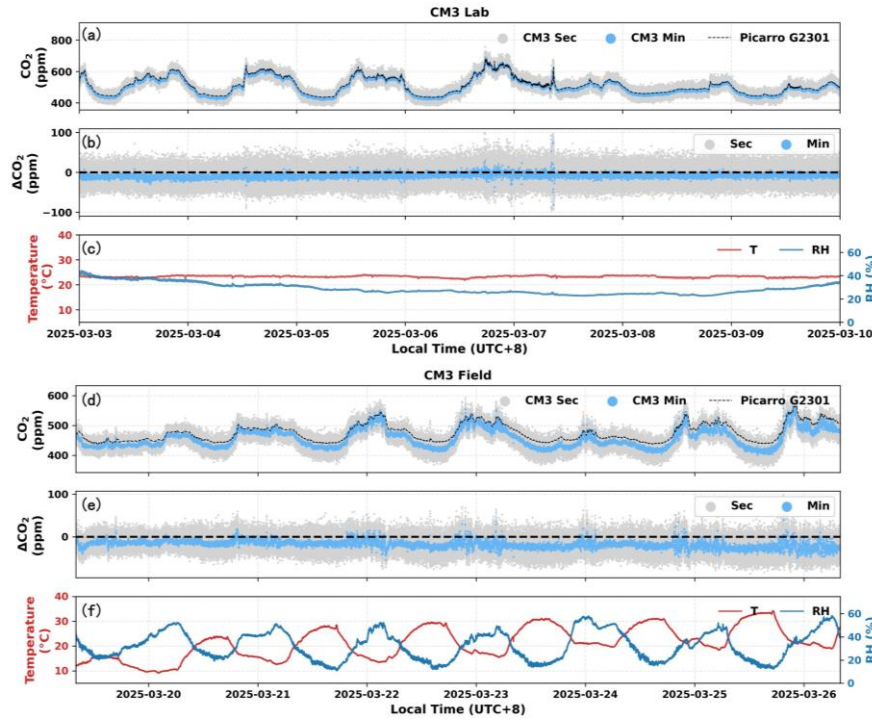

**Figure S2:** Time series of CM3 data during laboratory (a, c, e) and land-based field (b, d, f) observations. (a, d)

CM3-measured CO<sub>2</sub> concentration at second-level resolution (grey dots) and minute-level resolution (blue dots), alongside Picarro-measured CO<sub>2</sub> concentration (black line). (b, e) Time series of CO<sub>2</sub> concentration difference ( $\Delta\text{CO}_2 = \text{CM3-Picarro}$ ) at second-level (grey dots) and minute-level (blue dots) resolution. (c, f) Time series of ambient temperature (T, red line) and relative humidity (RH, blue line).

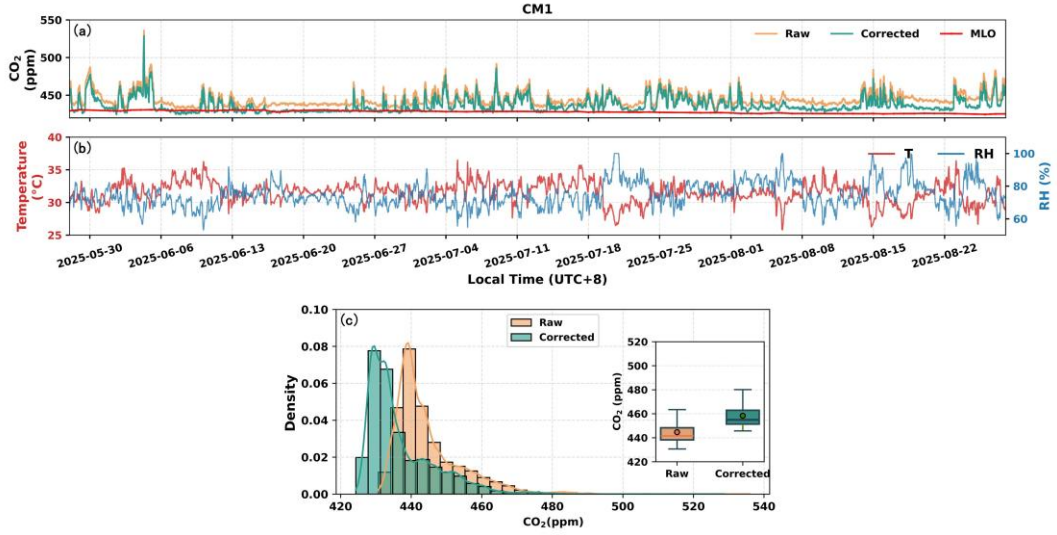

**Figure S3:** Offshore buoy observation results of CM1. (a) Hourly moving average time series of CO<sub>2</sub> concentrations from CMs before correction (orange line) and after correction (green line), together with daily mean CO<sub>2</sub> series from Mauna Loa Observatory (MLO, red line). The light red and light blue shaded backgrounds correspond to CO<sub>2</sub> fluctuation periods and stable periods, respectively. (b) Time series of ambient temperature (T, red line) and relative humidity (RH, blue line). (c) Histograms and boxplots showing the distributions of CO<sub>2</sub> concentrations before (orange bars) and after correction (green bars).

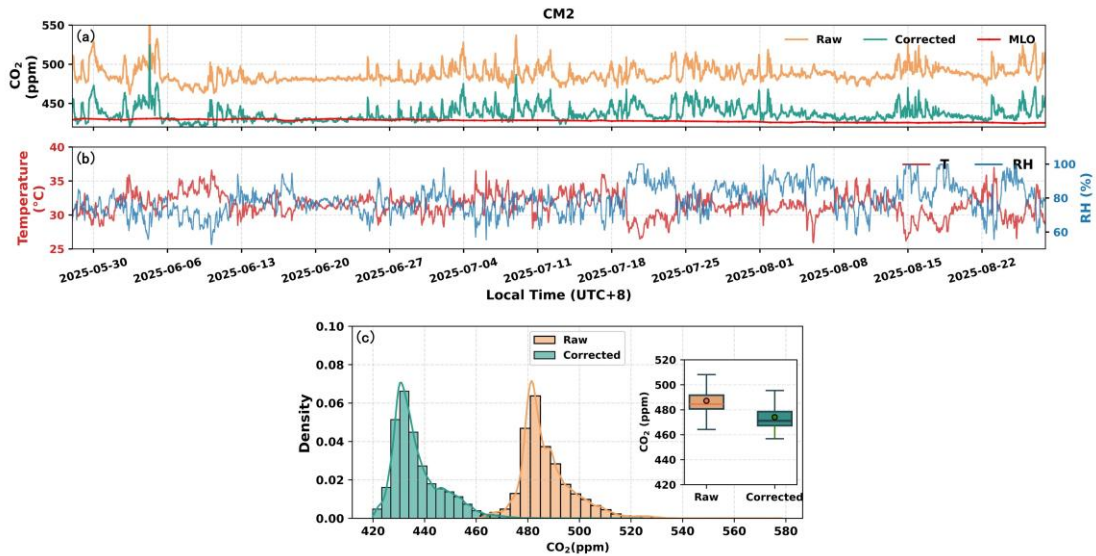

**Figure S4:** Offshore buoy observation results of CM2. (a) Hourly moving average time series of CO<sub>2</sub> concentrations from CMs before correction (orange line) and after correction (green line), together with daily mean CO<sub>2</sub> series from Mauna Loa Observatory (MLO, red line). The light red and light blue shaded backgrounds correspond to CO<sub>2</sub> fluctuation periods and stable periods, respectively. (b) Time series of ambient temperature (T, red line) and relative

humidity (RH, blue line). (c) Histograms and boxplots showing the distributions of CO<sub>2</sub> concentrations before (orange bars) and after correction (green bars).

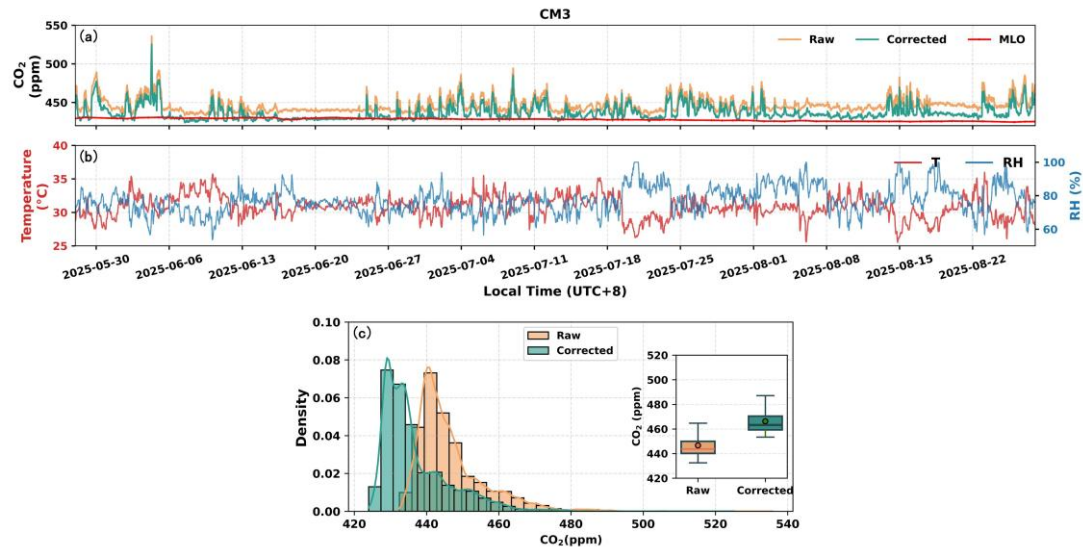

**Figure S5:** Offshore observation results of CM3. (a) Hourly moving average time series of CMs CO<sub>2</sub> before correction (yellow line) and after correction (green line), together with daily mean CO<sub>2</sub> series from MLO (red line). The light red and light blue shaded backgrounds correspond to CO<sub>2</sub> fluctuating and stable periods, respectively. (b) Time series of temperature (red line) and relative humidity (blue line). (c) Histograms and boxplots of CO<sub>2</sub> distributions before and after correction.
